# Supplementary material
Source: PubMed Central journal article supplement (PMC6645118)
Supplement: ao8b00736_si_001.pdf [file ao8b00736_si_001.pdf]

# **Substituent Effects on the Inclusion of 1-Alkyl-6-Alkoxy-Quinolinium in 4-Sulfonatocalix[n]arenes**

**Véronique Wintgens,<sup>a</sup> Cédric Lorthioir,<sup>b</sup> Zsombor Miskolczy,<sup>c</sup> Catherine Amiel,<sup>a</sup> László Biczók<sup>\*c</sup>**

*<sup>a</sup>Université Paris Est, ICMPE (UMR 7182), CNRS, UPEC, 2 rue Henri Dunant, F 94320 Thiais, France*

*<sup>b</sup>Sorbonne Université, CNRS, Collège de France, Laboratoire de Chimie de la Matière Condensée de Paris, LCMCP, 4 Place Jussieu, 75005 Paris, France*

*<sup>c</sup>Institute of Materials and Environmental Chemistry, Research Centre for Natural Sciences, Hungarian Academy of Sciences, P.O. Box 286, 1519 Budapest, Hungary*

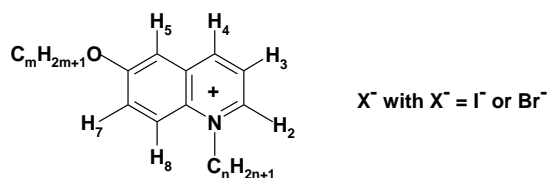

## Synthesis

1-Methyl-6-methoxy-quinolinium iodide ( $C_1C_1OQ^+I^-$ ) was synthesized as described previously<sup>1</sup>.  $^1H$  NMR (DMSO): 4.0 (s, 3H, O-CH<sub>3</sub>); 4.60 (s, 3H, N-CH<sub>3</sub>); 7.90 (m, 2H, H<sub>5</sub> and H<sub>7</sub>); 8.10 (m, 1H, H<sub>3</sub>); 8.43 (d, 1H, H<sub>8</sub>); 9.10 (d, 1H, H<sub>4</sub>); 9.30 (d, 1H, H<sub>2</sub>).

1-Ethyl-6-methoxy-quinolinium bromide ( $C_2C_1OQ^+Br^-$ ), 1-butyl-6-methoxy-quinolinium iodide ( $C_4C_1OQ^+I^-$ ), 1-hexyl-6-methoxy-quinolinium bromide ( $C_6C_1OQ^+Br^-$ ) and 1-octyl-6-methoxy-quinolinium bromide ( $C_8C_1OQ^+Br^-$ ) were synthesized as follows: 6-methoxyquinoline with a 10% molar excess of 1-bromoethane, 1-iodobutane, 1-bromohexane or 1-bromooctane was heated at 90°C in toluene (or in acetonitrile) in a closed vessel for 18 hours. After cooling, water was added, and the aqueous phase was extracted several times by diethyl ether. After evaporation of the aqueous phase, oily compounds were obtained; they turned in waxy compounds after drying under vacuum (except  $C_2C_1OQ^+Br^-$  that was isolated as a beige powder).

$^1H$  NMR (DMSO)

$C_2C_1OQ^+Br^-$ : 1.58 (t, 3H, CH<sub>3</sub>); 4.0 (s, 3H, O-CH<sub>3</sub>); 5.05 (q, 2H, N-CH<sub>2</sub>); 7.90 (m, 2H, H<sub>5</sub> and H<sub>7</sub>); 8.10 (m, 1H, H<sub>3</sub>); 8.53 (d, 1H, H<sub>8</sub>); 9.09 (d, 1H, H<sub>4</sub>); 9.35 (d, 1H, H<sub>2</sub>)

$C_4C_1OQ^+I^-$ : 0.92 (t, 3H, CH<sub>3</sub>); 1.38 (m, 2H, CH<sub>3</sub>-CH<sub>2</sub>-CH<sub>2</sub>); 1.92 (m, 2H, CH<sub>3</sub>-CH<sub>2</sub>-CH<sub>2</sub>); 4.0 (s, 3H, O-CH<sub>3</sub>); 5.03 (t, 2H, N-CH<sub>2</sub>); 7.90 (m, 2H, H<sub>5</sub> and H<sub>7</sub>); 8.13 (m, 1H, H<sub>3</sub>); 8.55 (d, 1H, H<sub>8</sub>); 9.12 (d, 1H, H<sub>4</sub>); 9.39 (d, 1H, H<sub>2</sub>)

$C_6C_1OQ^+Br^-$ : 0.85 (t, 3H, CH<sub>3</sub>); 1.27 (m, 4H, CH<sub>3</sub>-(CH<sub>2</sub>)<sub>2</sub>); 1.37 (m, 2H, CH<sub>3</sub>-(CH<sub>2</sub>)<sub>2</sub>-CH<sub>2</sub>); 1.93 (m, 2H, CH<sub>3</sub>-(CH<sub>2</sub>)<sub>3</sub>-CH<sub>2</sub>); 4.0 (s, 3H, O-CH<sub>3</sub>); 5.03 (t, 2H, N-CH<sub>2</sub>); 7.90 (m, 2H, H<sub>5</sub> and H<sub>7</sub>); 8.12 (m, 1H, H<sub>3</sub>); 8.55 (d, 1H, H<sub>8</sub>); 9.12 (d, 1H, H<sub>4</sub>); 9.38 (d, 1H, H<sub>2</sub>)

<sup>1</sup> C. D. Geddes, K. Apperson, and D. J. S. Birch: *Dyes Pigments* **44**, 69-74 (2000)

$C_8C_1OQ^+Br^-$ : 0.83 (t, 3H,  $CH_3$ ); 1.22 (m, 8H,  $CH_3-(CH_2)_4$ ); 1.36 (m, 2H,  $CH_3-(CH_2)_4-CH_2$ ); 1.93 (m, 2H,  $CH_3-(CH_2)_5-CH_2$ ); 4.0 (s, 3H, O- $CH_3$ ); 5.03 (t, 2H, N- $CH_2$ ); 7.91 (m, 2H,  $H_5$  and  $H_7$ ); 8.12 (m, 1H,  $H_3$ ); 8.55 (d, 1H,  $H_8$ ); 9.12 (d, 1H,  $H_4$ ); 9.38 (d, 1H,  $H_2$ )

1-Methyl-6-ethoxy-quinolinium iodide ( $C_1C_2OQ^+\Gamma$ ), 1-methyl-6-butoxy-quinolinium iodide ( $C_1C_4OQ^+\Gamma$ ), and 1-methyl-6-hexoxy-quinolinium iodide ( $C_1C_6OQ^+\Gamma$ ) were synthesized as follows: in the first step, 6-hydroxyquinoline was mixed with twice a molar excess of  $K_2CO_3$  in 3:7 water:dimethylformamide solvent. After stirring at room temperature during one hour, an equimolecular amount of 1-bromoethane (or 1-bromobutane, or 1-bromohexane) was added. The mixture was heated for 6 hours at  $90^\circ C$ . After cooling, the mixture was filtered and the liquid phase was extracted twice with diethylether. 6-Ethoxyquinoline (or 6-butoxyquinoline, or 6-hexoxyquinoline) was obtained after drying and evaporation of the organic phase. The quinoline derivatives were purified by column chromatography over silica gel with dichloromethane as eluent. In the second step, the quinoline derivatives were heated at  $90^\circ C$  with a 10% molar excess of iodomethane in toluene for 6 hours. After cooling, the iodide salts were filtered and washed with diethyl ether, and then dried under vacuum.

#### $^1H$ NMR (DMSO)

$C_1C_2OQ^+\Gamma$ : 1.45 (t, 3H,  $CH_3$ ); 4.29 (q, 2H, O- $CH_2$ ); 4.60 (s, 3H, N- $CH_3$ ); 7.91 (m, 2H,  $H_5$  and  $H_7$ ); 8.09 (m, 1H,  $H_3$ ); 8.43 (d, 1H,  $H_8$ ); 9.08 (d, 1H,  $H_4$ ); 9.30 (d, 1H,  $H_2$ )

$C_1C_4OQ^+\Gamma$ : 0.97 (t, 3H,  $CH_3$ ); 1.50 (m, 2H,  $CH_3-CH_2$ ); 1.81 (m, 2H,  $CH_3-CH_2-CH_2$ ); 4.22 (t, 2H, O- $CH_2$ ); 4.60 (s, 3H, N- $CH_3$ ); 7.90 (m, 2H,  $H_5$  and  $H_7$ ); 8.09 (m, 1H,  $H_3$ ); 8.42 (d, 1H,  $H_8$ ); 9.08 (d, 1H,  $H_4$ ); 9.30 (d, 1H,  $H_2$ )

$C_1C_6OQ^+\Gamma$ : 0.89 (t, 3H,  $CH_3$ ); 1.34 (m, 4H,  $CH_3-(CH_2)_2$ ); 1.47 (m, 2H,  $CH_3-(CH_2)_2-CH_2$ ); 1.82 (m, 2H,  $CH_3-(CH_2)_3-CH_2$ ); 4.21 (t, 2H, O- $CH_2$ ); 4.60 (s, 3H, N- $CH_3$ ); 7.90 (m, 2H,  $H_5$  and  $H_7$ ); 8.10 (m, 1H,  $H_3$ ); 8.42 (d, 1H,  $H_8$ ); 9.08 (d, 1H,  $H_4$ ); 9.30 (d, 1H,  $H_2$ )

## ITC experiments

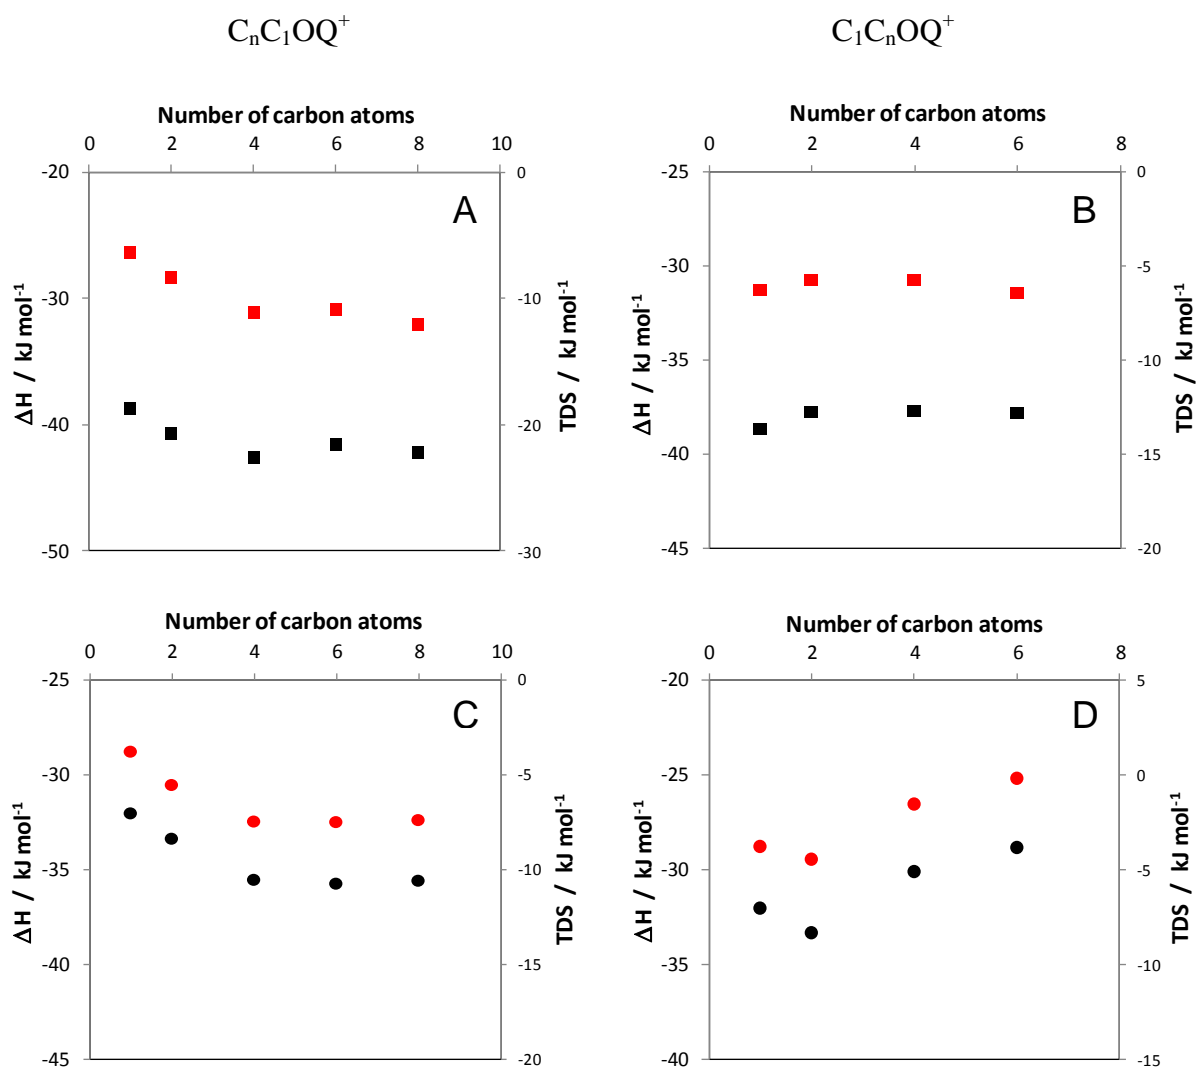

**Figure S1** Enthalpic (black) and entropic (red) contributions related to the formation of  $\text{C}_n\text{C}_1\text{OQ}^+$ –SCX4 (A),  $\text{C}_1\text{C}_n\text{OQ}^+$ –SCX4 (B),  $\text{C}_n\text{C}_1\text{OQ}^+$ –SCX6 (C), and  $\text{C}_1\text{C}_n\text{OQ}^+$ –SCX6 (D) complexes as a function of the alkyl or alkoxy chain length at pH 7 and 298 K.

## <sup>1</sup>H NMR experiments

**Table S1.** Variations of the <sup>1</sup>H NMR chemical shift related to the quinolinium species C<sub>n</sub>C<sub>1</sub>OQ<sup>+</sup>, as observed upon their complexation with SCX4. These data were determined at 2:1 SCX4:C<sub>n</sub>C<sub>1</sub>OQ<sup>+</sup> molar ratio and a total concentration of 10 mM.

| $\Delta\delta$ (ppm)                                       | H2     | H3     | H4     | H5     | H7     | H8     | N-CH <sub>3</sub>              | O-CH <sub>3</sub> |                             |                              |                 |
|------------------------------------------------------------|--------|--------|--------|--------|--------|--------|--------------------------------|-------------------|-----------------------------|------------------------------|-----------------|
| C <sub>1</sub> C <sub>1</sub> OQ <sup>+</sup> <sup>a</sup> | -3.695 | -3.565 | -2.848 | -0.553 | -0.287 | -0.669 | -1.074                         | -0.085            |                             |                              |                 |
| $\Delta\delta$ (ppm)                                       | H2     | H3     | H4     | H5     | H7     | H8     | N-CH <sub>2</sub> ( $\alpha$ ) | O-CH <sub>3</sub> | CH <sub>2</sub> ( $\beta$ ) | CH <sub>2</sub> ( $\gamma$ ) | CH <sub>3</sub> |
| C <sub>2</sub> C <sub>1</sub> OQ <sup>+</sup>              | -3.624 | -3.634 | -3.095 | -0.565 | -0.255 | -0.524 | -0.889                         | -0.044            | --                          | --                           | -0.557          |
| C <sub>4</sub> C <sub>1</sub> OQ <sup>+</sup>              | -3.532 | -3.640 | -3.209 | -0.613 | -0.269 | -0.477 | -0.757                         | -0.061            | -0.460                      | -0.438                       | -0.244          |
| C <sub>6</sub> C <sub>1</sub> OQ <sup>+</sup>              | -3.525 | -3.762 | -3.343 | -0.655 | -0.291 | -0.473 | -0.732                         | -0.077            | -0.409                      | -0.113                       | 0.001           |
| C <sub>8</sub> C <sub>1</sub> OQ <sup>+</sup>              | -3.558 | -3.797 | -3.382 | -0.668 | -0.299 | -0.492 | -0.737                         | -0.079            | -0.405                      | 0.061                        | 0.044           |

<sup>a</sup> Harangozó, J. G., Miskolczy, Z., Biczók, L., Wintgens, V., Lorthioir, C. *J. Incl. Macrocycl. Chem.*, **2015**, *81*, 377-384

**Table S2.** Variations of the <sup>1</sup>H NMR chemical shift related to the quinolinium species C<sub>1</sub>C<sub>n</sub>OQ<sup>+</sup>, as observed upon their complexation with SCX4. These data were determined at 2:1 SCX4:C<sub>1</sub>C<sub>n</sub>OQ<sup>+</sup> molar ratio and a total concentration of 10 mM.

| $\Delta\delta$ (ppm)                                       | H2     | H3     | H4     | H5     | H7     | H8     | N-CH <sub>3</sub> | O-CH <sub>3</sub>              |                             |                              |                 |
|------------------------------------------------------------|--------|--------|--------|--------|--------|--------|-------------------|--------------------------------|-----------------------------|------------------------------|-----------------|
| C <sub>1</sub> C <sub>1</sub> OQ <sup>+</sup> <sup>a</sup> | -3.695 | -3.565 | -2.848 | -0.553 | -0.287 | -0.669 | -1.074            | -0.085                         |                             |                              |                 |
| $\Delta\delta$ (ppm)                                       | H2     | H3     | H4     | H5     | H7     | H8     | N-CH <sub>3</sub> | O-CH <sub>2</sub> ( $\alpha$ ) | CH <sub>2</sub> ( $\beta$ ) | CH <sub>2</sub> ( $\gamma$ ) | CH <sub>3</sub> |
| C <sub>1</sub> C <sub>2</sub> OQ <sup>+</sup>              | -3.661 | -3.492 | -2.740 | -0.671 | -0.259 | -0.666 | -1.060            | -0.125                         | --                          | --                           | -0.033          |
| C <sub>1</sub> C <sub>4</sub> OQ <sup>+</sup>              | -3.714 | -3.541 | -2.789 | -0.514 | -0.262 | -0.647 | -1.076            | -0.035                         | -0.025                      | 0.007                        | 0.02            |
| C <sub>1</sub> C <sub>6</sub> OQ <sup>+</sup>              | -3.731 | -3.554 | -2.795 | -0.508 | -0.262 | -0.652 | -1.08             | -0.031                         | -0.016                      | 0.003                        | 0.034           |

<sup>a</sup> Harangozó, J. G., Miskolczy, Z., Biczók, L., Wintgens, V., Lorthioir, C. *J. Incl. Macrocycl. Chem.*, **2015**, *81*, 377-384

**Table S3.** Comparison of the  $^1\text{H}$  chemical shift variation induced for the protons of  $\text{C}_1\text{C}_1\text{OQ}^+$  upon complexation with SCX4 and SCX6. The corresponding molar ratios were  $\text{SCX4}:\text{C}_1\text{C}_1\text{OQ}^+ = 2:1$  and  $\text{SCX6}:\text{C}_1\text{C}_1\text{OQ}^+ = 3:1$ .

| $\Delta\delta$ (ppm) | H2      | H3     | H4     | H5     | H7      | H8      | N-CH <sub>3</sub> | O-CH <sub>3</sub> |
|----------------------|---------|--------|--------|--------|---------|---------|-------------------|-------------------|
| SCX4 <sup>a</sup>    | -3.695  | -3.565 | -2.848 | -0.553 | -0.287  | -0.669  | -1.074            | -0.085            |
| SCX6                 | -1.6275 | -1.367 | -1.232 | -1.056 | -0.3785 | -0.7535 | -0.831            | -0.583            |

a) Harangozó, J. G., Miskolczy, Z., Biczók, L., Wintgens, V., Lorthioir, C. *J. Incl. Macrocycl. Chem.*, **2015**, *81*, 377-384

**Table S4:** Comparison of the  $^1\text{H}$  chemical shift change occurring for the protons of  $\text{C}_4\text{C}_1\text{OQ}^+$  and  $\text{C}_1\text{C}_4\text{OQ}^+$  upon complexation with SCX6. In both cases, the molar ratio  $\text{SCX6}:\text{C}_n\text{C}_m\text{OQ}^+$  ( $m = 1, n = 4$  or  $m = 4, n = 1$ ) was set to 3:1.

|                                   |              |        |        |        |              |              |                                |                   |                             |                              |                 |
|-----------------------------------|--------------|--------|--------|--------|--------------|--------------|--------------------------------|-------------------|-----------------------------|------------------------------|-----------------|
| $\text{C}_4\text{C}_1\text{OQ}^+$ | H2           | H3     | H4     | H5     | H7           | H8           | N-CH <sub>2</sub> ( $\alpha$ ) | O-CH <sub>3</sub> | CH <sub>2</sub> ( $\beta$ ) | CH <sub>2</sub> ( $\gamma$ ) | CH <sub>3</sub> |
| $\Delta\delta$ (ppm)              | <sup>a</sup> | -1.326 | -0.98  | -0.79  | <sup>a</sup> | <sup>a</sup> | -0.689                         | -0.461            | -0.522                      | -0.532                       | -0.452          |
| $\text{C}_1\text{C}_4\text{OQ}^+$ | H2           | H3     | H4     | H5     | H7           | H8           | N-CH <sub>3</sub>              | O-CH <sub>2</sub> | CH <sub>2</sub> ( $\beta$ ) | CH <sub>2</sub> ( $\gamma$ ) | CH <sub>3</sub> |
| $\Delta\delta$ (ppm)              | <sup>a</sup> | -1.384 | -1.009 | -0.699 | <sup>a</sup> | -0.63        | -0.835                         | -0.407            | -0.396                      | -0.37                        | -0.35           |

<sup>a</sup> These values were not reported, due to the overlap of this  $^1\text{H}$  NMR peak with another one.
